# Supplementary material for: Direct multicomponent synthesis of benzocoumarins
Source: PeerJ journal article supplement (doi:10.7717/peerj-ochem.1), 2019-10-15
Supplement: Supplementary_information_(2).docx [file Supplementary_information_%282%29.docx]

**Supplementary Information (II)**

**Direct multicomponent synthesis of benzocoumarins**

**Ana Bornadiego, Jesús Díaz*, and Carlos F. Marcos***

## **NMR Spectra of Benzocoumarins**

**11-(Cyclohexylamino)-7,9-diphenylchromeno[3,4-*f*]isoindole-6,8,10(9*H*)-trione** **(1a)**

**2-Bromo-11-(cyclohexylamino)-7,9-diphenylchromeno[3,4-*f*]isoindole-6,8,10(9*H*)-trione (1b)**

**11-(Cyclohexylamino)-9-methyl-7-phenylchromeno[3,4-*f*]isoindole-6,8,10(9*H*)-trione (1c)**

**9-Methyl-11-(pentylamino)-7-phenylchromeno[3,4-*f*]isoindole-6,8,10(9*H*)-trione (1d)**

**11-((2,6-Dimethylphenyl)amino)-7-phenylchromeno[3,4-*f*]isoindole-6,8,10(9*H*)-trione (1e)**

**2-Bromo-11-(*tert*-butylamino)-7,9-diphenylchromeno[3,4-*f*]isoindole-6,8,10(9*H*)-trione (1f)**

**2-Bromo-9-methyl-11-(pentylamino)-7-phenylchromeno[3,4-*f*]isoindole-6,8,10(9*H*)-trione (1g)**

**2-Bromo-11-((2,6-dimethylphenyl)amino)-7-phenylchromeno[3,4-*f*]isoindole-6,8,10(9*H*)-trione (1h)**

**2-Bromo-11-(cyclohexylamino)-7-methyl-9-phenylchromeno[3,4-*f*]isoindole-6,8,10(9*H*)-trione (1i)**

**2-Bromo-11-(tert-butylamino)-7,9-dimethylchromeno[3,4-*f*]isoindole-6,8,10(9*H*)-trione (1j)**

**2-Bromo-7,9-dimethyl-11-(pentylamino)chromeno[3,4-*f*]isoindole-6,8,10(9*H*)-trione (1k)**

**11-(Benzylamino)-2-bromo-7-methylchromeno[3,4-*f*]isoindole-6,8,10(9*H*)-trione (1l)**

**2-Bromo-11-((2,6-dimethylphenyl)amino)-7-methylchromeno[3,4-*f*]isoindole-6,8,10(9*H*)-trione (1m)**

**2-Bromo-11-((4-methoxyphenyl)amino)-7-methylchromeno[3,4-*f*]isoindole-6,8,10(9*H*)-trione (1n)**
